# Supplementary material for: Promoting effect of nickel-chromium hydroxide on nickel phosphide nanosheets for efficient hydrogen production coupled with sulfion degradation
Source: Royal Society of Chemistry journal article supplement (doi:10.1039/d6sc02309f), 2026-04-29
Supplement: d6sc02309f1.pdf [file d6sc02309f1.pdf]

**Promoting effect of nickel-chromium hydroxide on nickel phosphide  
nanosheets for efficient hydrogen production coupled with sulfion  
degradation**

Xiaojun Wang,<sup>a</sup> Jieting Li,<sup>a</sup> Xinyu Zhu,<sup>a</sup> Zehua Xu,<sup>a</sup> Shuixiang Xie,<sup>a</sup> Shutong Chen, Yuxuan Wan,<sup>a</sup>

Guangyu Zhang,<sup>a</sup> Mingzheng Ge,<sup>a</sup> Wei Zhang,<sup>a</sup> Chao Wang,<sup>\*,b</sup> and Rui-Qing Li<sup>\*a</sup>

## **Experimental section**

### **Chemicals**

Nickel foam (NF) was supplied by Taiyuan source of power company. Ethanol absolute (99.7 %) was purchased from Shanghai Lingfeng Chemical Reagent Co. Nickel (II) nitrate hexahydrate ( $\text{Ni}(\text{NO}_3)_2 \cdot 6\text{H}_2\text{O}$ ),  $\text{CO}(\text{NH}_2)_2$  were purchased from Sinopharm Chemical Reagent Co, Ammonium fluoride ( $\text{H}_4\text{FN}$ ), Chromic acetate ( $\text{C}_6\text{H}_9\text{O}_6\text{Cr}$ ) were purchased Shanghai Aladdin Biochemical Technology Co. Sodium hypophosphite ( $\text{NaH}_2\text{PO}_2$ ) was purchased from Shanghai Macklin Biochemical Co.

### **Synthesis of $\text{Ni}_2\text{P}/\text{NiCr}(\text{OH})_2$**

The growth of  $\text{Ni}_2\text{P}/\text{NiCr}(\text{OH})_2$  on the NF surface was accomplished via a hydrothermal method followed by a phosphidation process. Initially, 2.0 mmol of  $\text{Ni}(\text{NO}_3)_2$ , 10.0 mmol of  $\text{CO}(\text{NH}_2)_2$ , and 6.0 mmol of  $\text{NH}_4\text{F}$  were dissolved in 35 mL of water and stirred to form a homogeneous solution. Subsequently, NF was immersed in the above solution and heated at 120 °C for 6 hours to obtain the  $\text{Ni}(\text{OH})_2$  precursor. Afterwards, a uniform solution was prepared by mixing 0.2 mmol of  $\text{C}_6\text{H}_9\text{O}_6\text{Cr}$ , 10.0 mmol of  $\text{CO}(\text{NH}_2)_2$ , 3.0 mmol of  $\text{NH}_4\text{F}$ , and 35 mL of water. The  $\text{Ni}(\text{OH})_2$  precursor was then transferred into this solution and heated at 150 °C for 6 hours to synthesize  $\text{NiCr}(\text{OH})_2$ . Finally, the as-synthesized  $\text{NiCr}(\text{OH})_2$  was subjected to phosphidation with 0.1 g of  $\text{NaH}_2\text{PO}_2$  at 400 °C for 2 hours under a high-purity nitrogen atmosphere.

For comparison,  $\text{Ni}_2\text{P}$  was also prepared under similar conditions, except that the phosphidation was carried out directly after the first hydrothermal step.

### **Materials characterization**

The morphology and microstructure of  $\text{Ni}_2\text{P}/\text{NiCr}(\text{OH})_2$  were characterized by a GeminiSEM 300 field emission scanning electron microscope (FE-SEM) and a high-resolution transmission electron microscope (HRTEM), so as to clarify the dispersion state of the nanoparticles and the morphological characteristics of the fiber matrix. The crystal structure of  $\text{Ni}_2\text{P}/\text{NiCr}(\text{OH})_2$  was analyzed via X-ray diffraction (XRD) to confirm the phase composition of each component. X-ray photoelectron spectroscopy (XPS) was employed to determine the elemental composition and valence state distribution on the surface of the catalyst.

### **Electrochemical measurements**

The electrochemical tests of the samples were performed on a Chenhua CHI660E

electrochemical workstation in a standard three-electrode system. The as-prepared samples, graphite electrode, and Hg/HgO electrode served as the working electrode, counter electrode, and reference electrode, respectively. Linear sweep voltammetry (LSV) at a scan rate of  $2 \text{ mV}\cdot\text{s}^{-1}$  was adopted to evaluate the catalytic activity of the samples; cyclic voltammetry (CV) was employed to calculate the double-layer capacitance ( $C_{dl}$ ) of the  $\text{Ni}_2\text{P}/\text{NiCr}(\text{OH})_2$  electrodes; electrochemical impedance spectroscopy (EIS) was measured via electrochemical impedance spectroscopy in the frequency range of  $0.1\text{--}10^5\text{Hz}$ ; chronopotentiometry was used to record the voltage-time (v-t) curves for assessing the stability of the catalysts. The potentials obtained from the above electrochemical tests were converted to the reversible hydrogen electrode (RHE) scale using the Nernst equation:  $E_{(\text{RHE})} = E_{(\text{Hg}/\text{HgO})} + 0.0592 \times \text{pH} + 0.098$ .

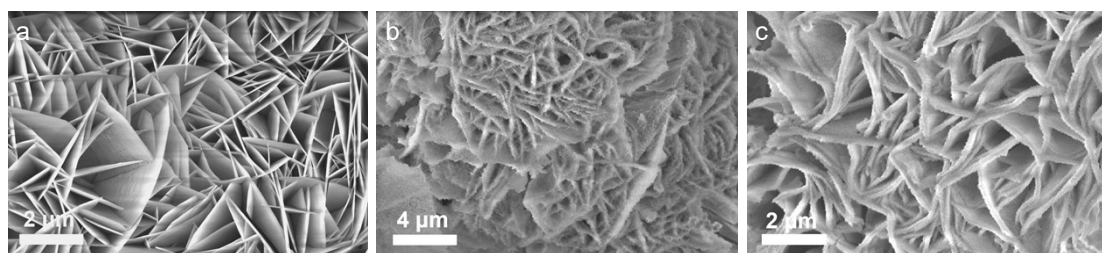

**Fig. S1** SEM images of (b)  $\text{Ni}(\text{OH})_2$  (c)  $\text{Ni}(\text{OH})_2/\text{NiCr}(\text{OH})$  and (d)  $\text{Ni}_2\text{P}/\text{NiCr}(\text{OH})_2$

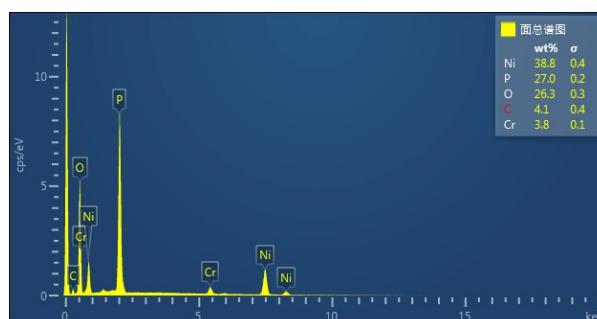

**Fig. S2** The energy-dispersive X-ray spectrum of  $\text{Ni}_2\text{P}/\text{NiCr}(\text{OH})_2$ .

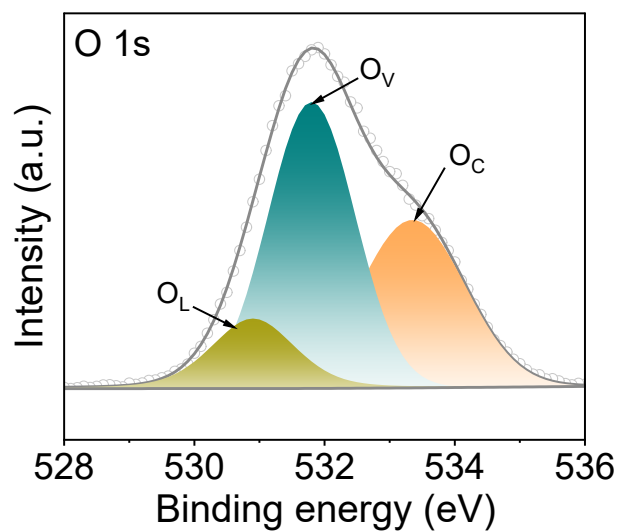

Fig. S3 O 1s XPS spectrum of  $\text{Ni}_2\text{P}/\text{NiCr}(\text{OH})_2$ .

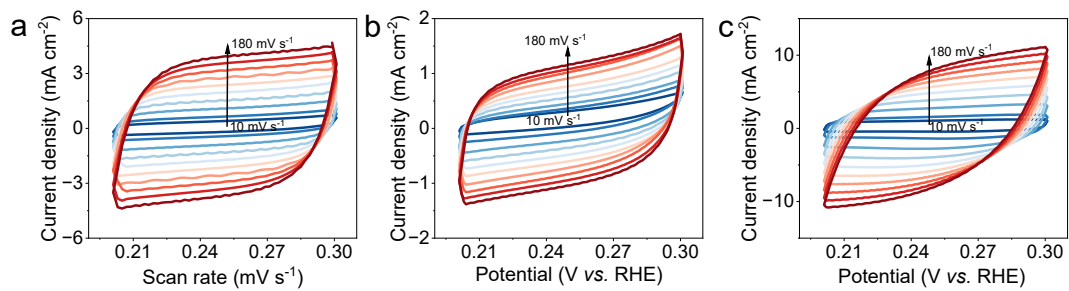

Fig. S4 CV curves at different sweep speeds of (a)  $\text{Ni}_2\text{P}/\text{NiCr}(\text{OH})_2$ , (b)  $\text{Ni}_2\text{P}$  and (c)  $\text{Pt}/\text{C}$ .

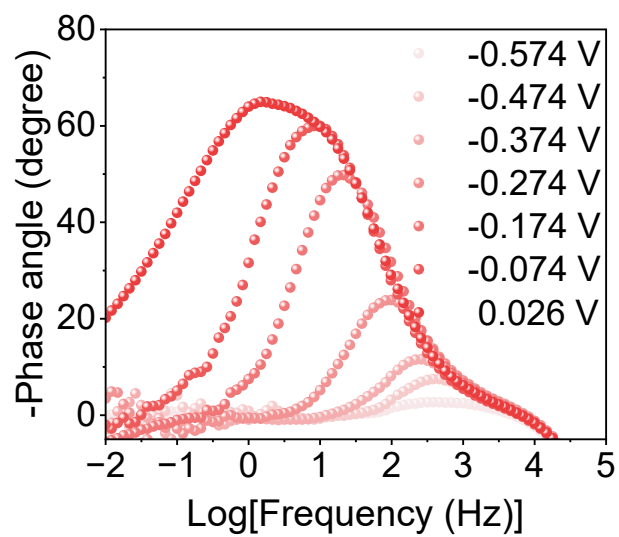

Fig. S5 Bode phase plots of  $\text{Ni}_2\text{P}$  toward HER.

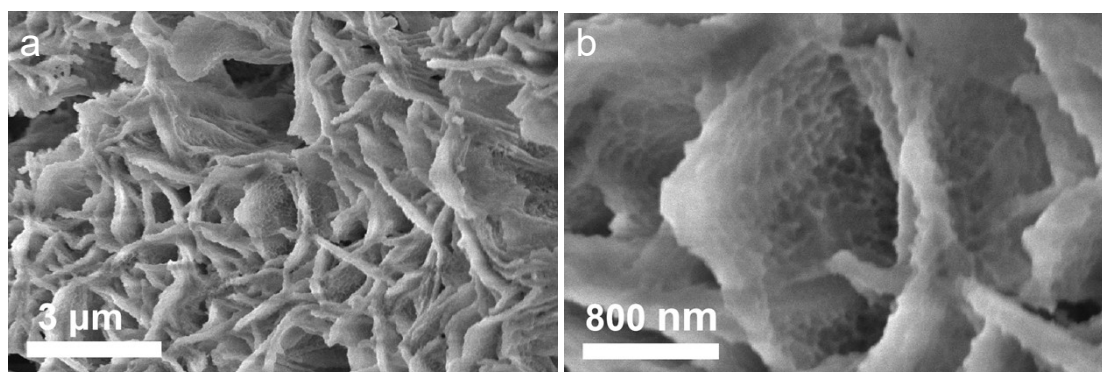

Fig. S6 SEM images of  $\text{Ni}_2\text{P}/\text{NiCr}(\text{OH})_2$  after the HER test.

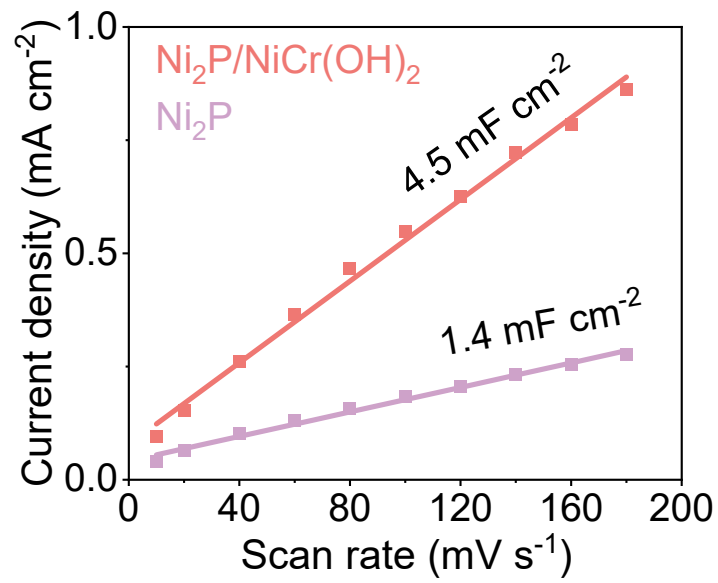

Fig. S7  $C_{dl}$  values of different catalysts in 1 M KOH.

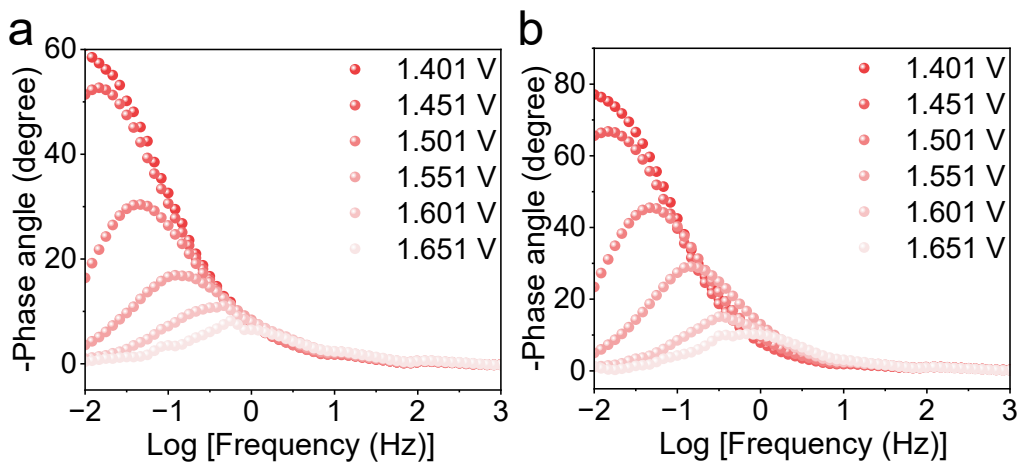

Fig. S8 Bode phase plots of (c)  $Ni_2P$  and (d)  $Ni_2P/NiCr(OH)_2$  toward OER.

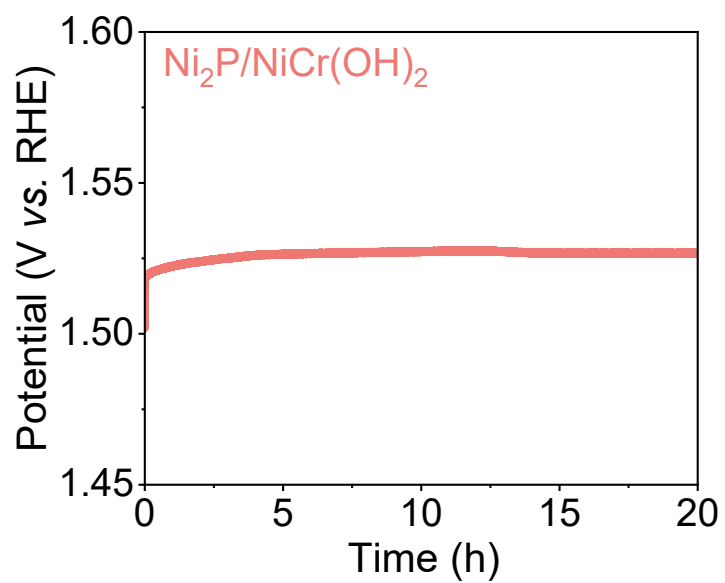

Fig. S9 Durability test of  $\text{Ni}_2\text{P}/\text{NiCr}(\text{OH})_2$  for OER.

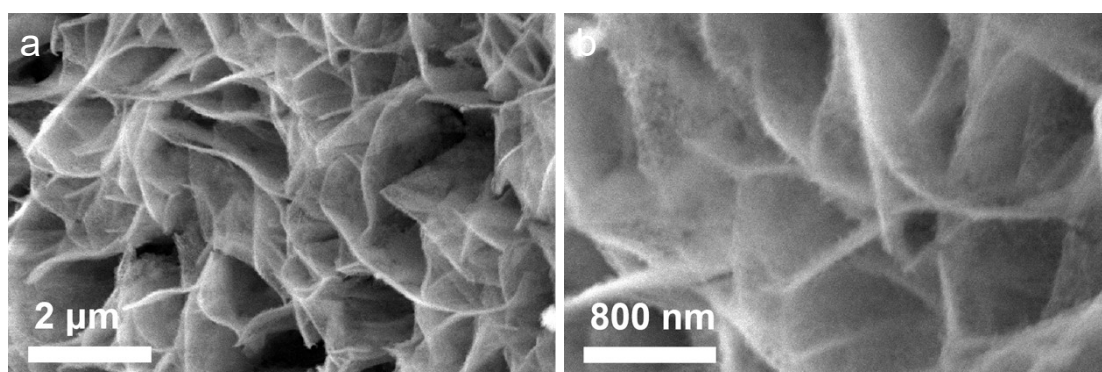

Fig. S10 SEM images of  $\text{Ni}_2\text{P}/\text{NiCr}(\text{OH})_2$  after the SOR test.

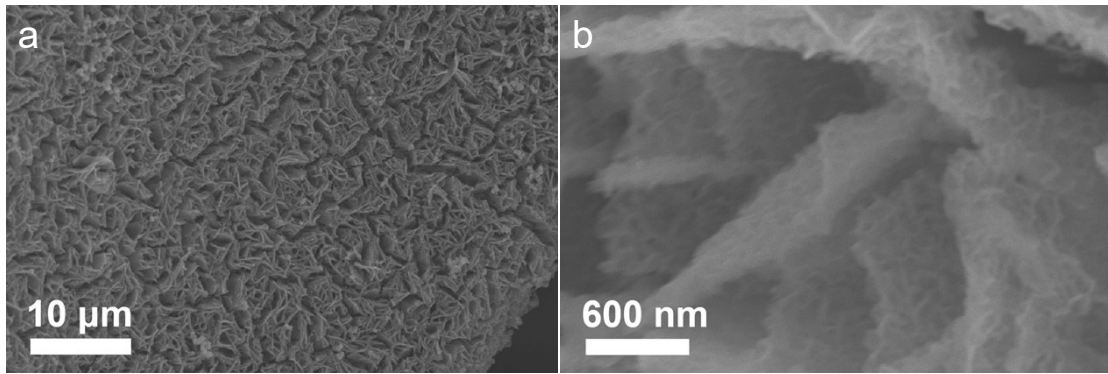

**Fig. S11** SEM images of  $\text{Ni}_2\text{P}/\text{NiCr}(\text{OH})_2$  after the OER test.

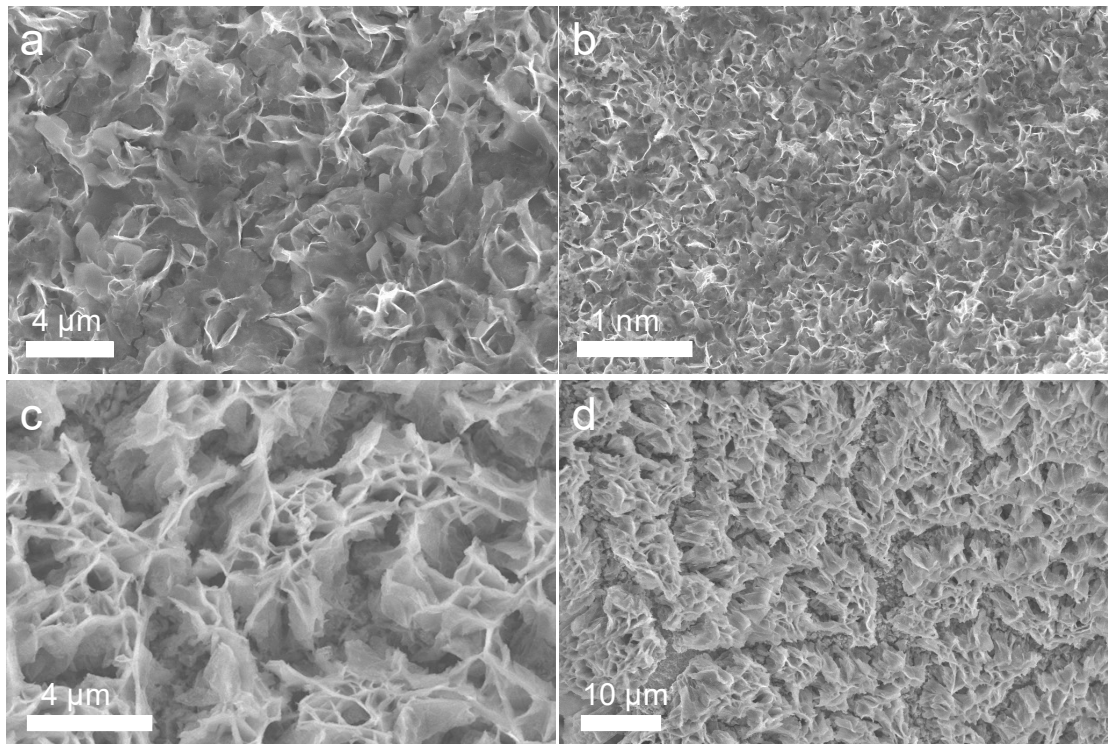

**Fig. S12** SEM image of the anode (a-b) and cathode (c-d)  $\text{Ni}_2\text{P}/\text{NiCr}(\text{OH})_2$  after 800 hours of HWE testing.

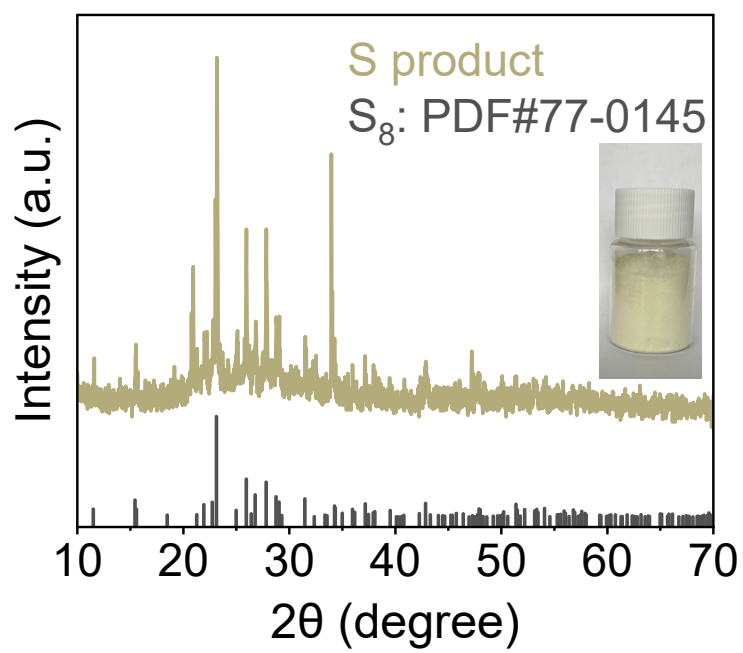

**Fig. S13** XRD pattern of the collected S product. Inset: Digital image of S product.

**Table S1** The comparison of HER performance of Ni<sub>2</sub>P/NiCr(OH)<sub>2</sub> with reported catalysts.

| Catalysts                                                                             | Voltage at 10 mA cm <sup>-2</sup> (V) | Voltage at 300 mA cm <sup>-2</sup> (V) | Electrolytes                         | Reference electrode | Reference |
|---------------------------------------------------------------------------------------|---------------------------------------|----------------------------------------|--------------------------------------|---------------------|-----------|
| Ni <sub>2</sub> P/NiCr(OH) <sub>2</sub>                                               | 0.110                                 | 0.277                                  | 1 M KOH                              | Hg/HgO              | This work |
| NiFeP/SG                                                                              | 0.115                                 | —                                      | 1 M KOH                              | Ag/AgCl             | S1        |
| NiFe-MoF                                                                              | 0.116                                 | ~0.250                                 | 1 M KOH                              | Hg/HgO              | S2        |
| CeO <sub>2</sub> -LDH/Ni <sub>3</sub> S <sub>2</sub> /MoS <sub>2</sub>                | 0.116                                 | ~0.280                                 | 1 M KOH                              | Ag/AgCl             | S3        |
| Co-Fe <sub>2</sub> P                                                                  | 0.117                                 | ~0.260                                 | 1 M KOH                              | Hg/HgO              | S4        |
| Mo@NiSe <sub>2</sub>                                                                  | 0.118                                 | —                                      | 0.5 M H <sub>2</sub> SO <sub>4</sub> | Ag/AgCl             | S5        |
| CoNiFe/MnO@CNTs                                                                       | 0.122                                 | —                                      | 1 M KOH                              | Ag/AgCl             | S6        |
| Fe <sub>2</sub> (MoO <sub>4</sub> ) <sub>3</sub> @GQD-NF-1                            | 0.136                                 | ~0.270                                 | 1 M KOH                              | Hg/HgO              | S7        |
| WSe <sub>2</sub> -CuO                                                                 | 0.141                                 | —                                      | 0.5 M H <sub>2</sub> SO <sub>4</sub> | Ag/AgCl             | S8        |
| Co <sub>9</sub> S <sub>8</sub> @Co <sub>9</sub> S <sub>8</sub> @MoS <sub>2</sub> -0.5 | 0.173                                 | —                                      | 1 M KOH                              | Ag/AgCl             | S9        |
| NiMo-MOF                                                                              | 0.192                                 | —                                      | 1 M KOH                              | Ag/AgCl             | S10       |
| NiFe <sub>2</sub> O <sub>4</sub> /NiO/g-C <sub>3</sub> N <sub>4</sub>                 | 0.206                                 | —                                      | 1 M KOH                              | —                   | S11       |
| ReS <sub>2</sub> /CoS@NF                                                              | 0.213                                 | —                                      | 1 M KOH                              | Ag/AgCl             | S12       |
| EM-FeNiP@HCNT                                                                         | 0.224                                 | —                                      | 0.1 M KOH                            | Ag/AgCl             | S13       |
| CSMX-800                                                                              | 0.270                                 | —                                      | 1 M KOH                              | Hg/HgO              | S14       |
| Ti <sub>3</sub> C <sub>2</sub> -CoS <sub>2</sub>                                      | 0.276                                 | —                                      | 1 M KOH                              | Ag/AgCl             | S15       |

**Table S2** The comparison of SOR performance of Ni<sub>2</sub>P/NiCr(OH)<sub>2</sub> with reported catalysts.

| Catalysts                                     | Voltage at 100 mA cm <sup>-2</sup> (V) | Voltage at 300 mA cm <sup>-2</sup> (V) | Electrolytes                                       | Reference electrode | Reference |
|-----------------------------------------------|----------------------------------------|----------------------------------------|----------------------------------------------------|---------------------|-----------|
| Ni <sub>2</sub> P/NiCr(OH) <sub>2</sub>       | 0.363                                  | 0.401                                  | 1 M NaOH+1 M Na <sub>2</sub> S                     | Hg/HgO              | This work |
| Co <sub>x</sub> P/NF                          | 0.386                                  | ~0.580                                 | 1 M KOH+1 M Na <sub>2</sub> S                      | Hg/HgO              | S16       |
| Co <sub>9</sub> S <sub>8</sub> /CoOOH         | 0.417                                  | ~0.610                                 | 1 M NaOH+1 M Na <sub>2</sub> S                     | Hg/HgO              | S17       |
| IrO <sub>2</sub>                              | 0.430                                  | —                                      | 1 M NaOH+1 M Na <sub>2</sub> S                     | Hg/HgO              | S18       |
| NiFe-LDH/FeNi <sub>2</sub> S <sub>4</sub> /NF | 0.440                                  | —                                      | 1 M KOH+1 M Na <sub>2</sub> S                      | Hg/HgO              | S19       |
| CoNiS                                         | 0.456                                  | ~0.600                                 | 1 M NaOH+1 M Na <sub>2</sub> S                     | Hg/HgO              | S20       |
| Pdene@Om                                      | 0.458                                  | —                                      | 1 M KOH + 3 M Na <sub>2</sub> S                    | Hg/HgO              | S21       |
| TPA@Ni <sub>3</sub> S <sub>2</sub>            | 0.480                                  | ~0.600                                 | 1 M NaOH+1 M Na <sub>2</sub> S                     | Hg/HgO              | S22       |
| np-NiMo-S                                     | 0.486                                  | —                                      | 1 mol/L KOH + 1 mol/L Na <sub>2</sub> S + seawater | Hg/HgO              | S23       |
| CuS/Ru-30                                     | 0.490                                  | —                                      | 1 M NaOH+1 M Na <sub>2</sub> S                     | Hg/HgO              | S24       |
| NiSe/NF                                       | 0.500                                  | ~0.640                                 | 1 M NaOH+1 M Na <sub>2</sub> S                     | Hg/HgO              | S25       |
| Au@MoS <sub>2</sub>                           | 0.520                                  | —                                      | 1 M KOH+ 0.5 M Na <sub>2</sub> S                   | Ag/AgCl             | S26       |
| CoS/MoS <sub>2</sub>                          | 0.590                                  | —                                      | 1 M NaOH+1 M Na <sub>2</sub> S                     | Hg/HgO              | S27       |
| Ru-Ni <sub>3</sub> S <sub>2</sub> /NF         | 0.598                                  | —                                      | 1.0 M NaOH +1.75 M Na <sub>2</sub> S               | Hg/HgO              | S28       |
| CoNiOOH                                       | 0.650                                  | —                                      | 1 M KOH+ 0.5 M Na <sub>2</sub> S                   | Ag/AgCl             | S29       |

**Table S3** The comparison of HWE performance of Ni<sub>2</sub>P/NiCr(OH)<sub>2</sub> with reported catalysts.

| Catalysts                                                   | Voltage at 100 mA cm <sup>-2</sup> (V) | Voltage at 300 mA cm <sup>-2</sup> (V) | Electrolytes                                                 | Reference |
|-------------------------------------------------------------|----------------------------------------|----------------------------------------|--------------------------------------------------------------|-----------|
| Ni <sub>2</sub> P/NiCr(OH) <sub>2</sub>                     | 0.697                                  | 0.830                                  | HER(1 M KOH)+SOR(1 M NaOH+1 M Na <sub>2</sub> S)             | This work |
| Ag-Ni <sub>3</sub> S <sub>2</sub> /NF                       | 0.749                                  | —                                      | HER(1 M KOH)+SOR(1 M NaOH+2 M Na <sub>2</sub> S)             | S30       |
| RuO <sub>2</sub> -Co <sub>3</sub> O <sub>4-x</sub>          | 0.750                                  | ~1.600                                 | HER(1 M NaOH+0.5 M NaCl)+SOR(1 M NaOH+1 M Na <sub>2</sub> S) | S31       |
| CoS <sub>2</sub> /MoS <sub>2</sub> /Co MoO <sub>4</sub> /NF | 0.770                                  | —                                      | HER(1 M NaOH+0.5 M NaCl)+SOR(1 M NaOH+1 M Na <sub>2</sub> S) | S32       |
| V <sub>Pd</sub> -Pd <sub>4</sub> S <sub>MNRs</sub>          | 0.776                                  | ~1.000                                 | HER(1 M NaOH in sweater)+SOR(1 M NaOH+1 M Na <sub>2</sub> S) | S33       |
| S-NiMoO <sub>4</sub> /NF                                    | 0.800                                  | —                                      | HER(1 M KOH)+SOR(1 M KOH+1 M Na <sub>2</sub> S)              | S34       |
| Ni <sub>3</sub> P                                           | 0.806                                  | ~1.000                                 | HER(1 M NaOH)+SOR(1 M KOH+1 M Na <sub>2</sub> S)             | S35       |
| NS@NC/NF                                                    |                                        |                                        |                                                              |           |
| FeSe <sub>2</sub> /IF-V <sub>Se</sub>                       | 0.900                                  | —                                      | HER(1 M NaOH)+SOR(1 M NaOH+1 M Na <sub>2</sub> S)            | S36       |

## References

- [S1] R. Li, B. Wang, T. Gao, R. Zhang, C. Xu, X. Jiang, J. Zeng, Y. Bando, P. Hu, Y. Li and X. Wang, *Nano Energy*, 2019, **58**, 870.
- [S2] B Dai, X Wei, L Chen, X Bao, Q Zhong, H Qu, *J. Colloid Interface Sci.*, 2025, **682**, 80-93.
- [S3] H. Li, F. Chen, X. Wu, D. Wang, Y. Ren, Y. Li, *Materials*, 2024, **17**, 4876.
- [S4] S. Wang, P. Yang, X. Sun, H. Xing, J. Hu, P. Chen, Z. Cui, W. Zhu and Z. Ma, *Appl. Catal., B*, 2021, **297**, 120386.
- [S5] M. Pratheeksha, N. Hemavathi, D. Sumanth, S.Kalyan, B.Geetha, R. Shwetharani, *Energy Fuels*, 2025, **39**, 6930-6941.
- [S6] C. Zhou, X. Han, F. Zhu, X. Zhang, Y. Lu, J. Lang, X. Cao, H Gu, *Int. J. Hydrogen Energy*, 2022, **47**, 27775-27786.
- [S7] Z. Yin, B. Zhang, Q. Zhang, Y. Zhou, J. Li, Y. Wang, L. Wan, Z. Ma, *J. Mol. Struct.*, 2025, **1329**,

141402.

- [S8] R. Patel, P. Pataniya, S. Siraj, P. Sahatiya, C. Sumesh, *Renewable Energy*, 2024, **55**, 815-827.
- [S9] J. Li, G. Li, J. Wang, C. Xue, X. Li, S. Wang, B. Han, M. Yang, L. Li, *Inorg. Chem. Front.*, 2020, **7**, 191-197.
- [S10] R. Pavadai, M. Arivazhagan, S. Prabu, S. Ingavale, G. Honnu, V. Gowri, S. Thongmee, C. Issro, D. Khamboonrueang, S. Kityakarn, *Mater. Chem. Phys.*, 2025, **345**, 131245.
- [S11] M. Begam, L. Kumaresan, S. Hemapriya, P. Velusamyc, S. Ashokd, N. Dineshababu, *Diamond Relat. Mater.*, 2025, **157**, 112489.
- [S12] N. Trivedi, P. Sharma, K. Joshi, V. Patel, CK. Sumesh, P. Pataniya, *Int. J. Hydrogen Energy*, 2024, **61**, 1212-1219.
- [S13] M. Zheng, K. Shi, Y. Zhao, T. Zhang, F. Liu, J. Liu, Y. Sun, Y. Zhang, H. Wang, *Int. J. Hydrogen Energy*, 2024, **72**, 1077-1090.
- [S14] K. Farooq, M. Murtaza, Z. Yang, A. Waseem, Y. Zhu, Y. Xia, *Nanoscale Adv.*, 2024, **6**, 3169-3180.
- [S15] S. Devi, R. Navamathavan, *J. Electrochem. Soc.*, 2023, **170**, 096503.
- [S16] H. Chen, M. Xiong, S. Qiao, S. Wu, C. Rao, G. Luo, L. Wang, S. Ci, Z. Wen, *Chem. Eng. J.*, 2025, **524**, 169400.
- [S17] Y. Pan, P. Dai, Z. Yang, X. Tang, K. Wang, M. Wu, *Dalton Trans.*, 2025, **54**, 10589-10598.
- [S18] M. Zhang, J. Guan, Y. Tu, S. Chen, Y. Wang, S. Wang, L. Yu, C. Ma, D. Deng and X. Bao, *Energy Environ. Sci.*, 2020, **13**, 119.
- [S19] L. Ai, Y. Tian, T. Xiao, J. Zhang, C. Zhang, J. Jiang, *J. Colloid Interface Sci.*, 2024, **673**, 607-615.
- [S20] D. Wu, W. Wang, J. Li, H. Dong, H. Shi, J. Qin, Y. Hu, L. Cao, B. Dong, *Int. J. Hydrogen Energy*, 2026, **201**, 153013.
- [S21] H. Sun, C. Wangzi, Z. Yang, J. Zhang, Y. Liang, J. Wang, Y. Zheng, J. Pan, C. Li, J. Cao, *Appl. Catal., B*, 2026, **381**, 125888.
- [S220] L. Jin, C. Chen, L. Hu, X. Liu, Y. Ding, J. He, H. Li, N. Li, D. Chen, Q. Xu, J. Lu, *Appl. Surf. Sci.*, 2022, **605**, 154756.
- [S23] M. Yang, J. Ding, Z. Wang, J. Zhang, Z. Peng, X. Liu, *Chin. Chem. Lett.*, 2025, **36**, 110861.
- [S24] A. Min, V. Maheskumar, D. Lee, A. Kumar, M. Joo, S. Arumugam, C. Yong, *J. Energy Chem.*, 2024, **99**, 541-552.

- [S25] C. Duan, C. Tang, S. Yu, L. Li, J. Li, Y. Zhou, *Appl. Catal., B*, 2023, **324**, 122255.
- [S26] M. Shi, H. Yang, X. Xiao, P. Jin, Y. Chen, *Chem. Eng. J.*, 2025, **522**, 167474.
- [S27] K. Gao, M. Zhou, Y. Liu, S. Wang, R. Fu, Z. Wang, J. Guo, Z. Liu, H. Wang, Y. Zhao, Q. Wang, *J. Colloid Interface Sci.*, 2024, **657**, 290-299.
- [S28] Q. Zeng, L. Ai, X. Liu, A. Liu, J. Jiang, *Chem. Eng. J.*, 2025, **524**, 169473.
- [S29] M. Yang, T. Wei, C. Zeng, J. Zhang, Y. Liu, J. Luo, G. Hu, X. Liu, *Chem. Eng. J.*, 2024, **498**, 155799.
- [S30] M. Ming, J. Kang, Y. Gu, J. Zhang, Q. Zhang, G. Fan, Q. Shen, *J. Environ. Chem. Eng.*, 2025, **13**, 119139.
- [S31] H. Yang, X. Long, F. Liu, J. Zhou, N. Chen, R. Feng, Y. Zhang, X. Fu, J. Luo, B. Zhao, *Appl. Catal., B*, 2025, **366**, 125037.
- [S32] K. Tang, C. Yang, S. Zhang, J. Yang, L. Shi, S. Xiong, A. Tang, *Int. J. Hydrogen Energy*, 2025, **163**, 150823.
- [S33] W. Wang, Q. Mao, S. Jiang, K. Deng, H. Yu, Z. Wang, Y. Xu, L. Wang, H. Wang, *Appl. Catal., B*, 2024, **340**, 123194.
- [S34] Y. Chen, Y. Wang, B. Liu, C. Zhang, D. Sun, H. Liu, W. Zhou, *J. Colloid Interface Sci.*, 2024, **664**, 469-477.
- [S35] K. Tong, W. Qiu, S. Zhang, W. Zhao, P. Wu, F. Lin, L. Chu, H. Wang, W. Tian, M. Huang, *Chem. Eng. J.*, 2025, **510**, 161611.
- [S36] X. Wang, J. Jiang, J. Zhang, Q. Zeng, A. Liu, L. Ai, *J. Colloid Interface Sci.*, 2025, **684**, 367-376.
